# Supplementary material for: A systematic review and network meta-analysis of existing pharmacologic therapies in patients with idiopathic sudden sensorineural hearing loss
Source: PLoS One. 2019 Sep 9;14(9):e0221713. doi: 10.1371/journal.pone.0221713 (PMC6733451; doi:10.1371/journal.pone.0221713)
Supplement: S1 Data — (XLSX) [file pone.0221713.s007.xlsx]

## Sheet: General study traits
S#																																		Conflict of interest	Single/Multicenter	Funding	Analysis Type	Comparator Label (list of drugs for intervention arm)	Comparator Main Domanin Type
	STUDY CHARACTERISTICS																INTERVENTIONS Drug A				Drug B			Drug C			Drug D							Yes	Single	Industry	Main	systemic steroids	dexamethasone
	RefID	Companion RefIDs/specific companion (if applicable)	First Author (publication year)	Analysis type	Specify the subgroup	Inclusion criteria	Exclusion criteria	Single/Multicenter	Country of conduct (name of the country)	Recruitment period (range-years)	Total Sample Size	# of Tx groups	Funding	Trial ID # - NCT	Longest intended follow up- Months	Conflict of Interest	Interventions Label	Main Domanin Type	Specific drug name (if applicable)	Treatment strategy (dose, unit, frequency, period, mood of administration)	Main Domanin Type	Specific drug name	Treatment strategy (dose, unit, frequency, period, mood of administration)	Main Domanin Type	Specific drug name	Treatment strategy (dose, unit, frequency, period, mood of administration)	Main Domanin Type	Specific drug name	Treatment strategy (dose, unit, frequency, period, mood of administration)	Notes				No	Multicenter	Non-Industry	Subgroup	antivirals	hydrocortisone
1	195	NA	Koo(2015)	Main	NA	age 20–70 years, ISSNHL, no history of other treatments for hearing loss, and a visit to the hospital within 1 week from the day of symptom onset. ISSNHL was diagnosed by the sudden onset SNHL with 30 dB and more decrease of hearing threshold in at least consecutive three frequencies. voluntary written agreementand being available for a 28-day follow-up.	The patients who had an inappropriate medical condition for this clinical trial, like severe renal, hepatic or respiratory disease, severe heart failure, a history of myocardial infarction within the previous 4 weeks, pregnancy, breast-feeding, child-bearing potential and known allergic reaction or adverse event to ginkgo leaf were excluded. Patients who had symptoms suggesting different mechanis…	Multicenter	Korea	NR- study period June 2011 and January 2014	59	2	Industry	KCT0001381	28 (±2)	No	[IV EGb761 (Ginkgo bilbo extract)+ methylprednisolone+ Oral EGb761] vs (Placebo+ methylprednisolone+ Oral EGb761)	other therapies (please specify in the next column)	Ginkgo biloba extract	From day 1 (first day of administration) to day 5, EGb761 or normal saline was administered once daily by intravenous infusion. In the EGb761 group, EGb761 (Tanamin ) 175 mg/ 50 mL in normal saline (500 mL) was administered; normal saline (550 mL) was used in the placebo group.	systemic steroids	methylprednisolone	methylprednisolone was administered orally for 14 days (48 mg for the first 7 days, and then tapered to 40 mg for the next 2 days, 16 mg for the next 2 days, and 8 mg for the final 3 days).	other therapies (please specify in the next column)	Ginkgo biloba extract	Oral EGb761 (Tanamin ) tablets (160 mg/day, twice daily) were administered in both groups from day 15 to day 28.	NA	NA	NA	-				NR		No funding		vasodilators	cortisone
2	276	NA	Min Hong (2009)	Main	NA	sensorineural hearing loss of 30 dB or more with over three contiguous audiometric frequencies that occurred in fewer than three days.	any patients with ISSHL who had vertigo, diabetes, Ménière’s disease, tumors, or a treatment onset of more than 15 days.	Single	Korea	from May 2007 to January 2009	75	2	Non-Industry	NR	3 months	No	Intratympanic Steroid (dexamethasone) vs Systemic/ Oral Steroid (prednisolone) plus other medication	intratympanic steroid-combination therapies	dexamethasone	IT injections of 0.3 to 0.4 cc of dexamethasone (5 mg/mL) into the middle ear were performed (by anesthetizing the tympanic membrane with 10 percent Xylocaine) once a day over the course of eight days.	systemic steroids	prednisolone	Oral prednisolone 60 mg/d for 4 days, followed by 40 mg/d for 2 days, and 20 mg/d for 2 days	See notes	See notes	See notes	NA	NA	NA	Note : in addition to oral steroid, control group received other medications, such as a peripheral vasodilator and ginkgo biloba extract (no further information about strategy is providedd)
3	288	NA	Gundogan (2013)	Main	NA	(1) unexplained sudden sensorineural hearing loss, which was defined as a sensorineural hearing loss of at least 30 dB at 3 contiguous frequencies over a period of 3 days; (2) time from the onset of hearing loss to the treatment of 14 days; (3) no initial treatment before; (4) no history of ear disease in the affected ear; (5) and unilateral sudden hearing loss.	chronic otitis media, trauma, previous radiotherapy or chemotherapy, recent use of ototoxic drugs, liver or renal dysfunction, retrocochlear lesion, and interval to first treatment greater than 14 days from onset	Single	Turkey	between December 2009 and January 2013	79	2	No funding	NR	1 month	No	combination therapy[intratympanic steroid (methylprednisolone) + oral steroid (methylprednisolone) vs oral steroid (methylprednisolone)	intratympanic steroid-combination therapies	intratympanic methylprednisolone	IT steroid (0.4 mL of 62.5 mg/mL methylprednisolone) was performed 4 times for 2 consecutive weeks (once every 3 days).	systemic steroids	methylprednisolone	14-day course of oral steroid (1 mg/kg of oral methylprednisolone and 10 mg taper every 3 days).	NA	NA	NA	NA	NA	NA	-								intratympanic steroid-combination therapies	valacyclovir
4	297	NA	Bianchin (2010)	Main	NA	The inclusion criterion was the presence of an acute, onesided SSHL that occurred not later then 20 days before the beginning of treatment, with a difference of at least 30 dB as compared to the unaffected ear in at least three connected frequencies. At diagnosis, the patients showed a value of LDL cholesterol >120 mg/dL and/or fibrinogen >320 mg/dL .	Patients who had been treated in the past for hearing loss, patients who have conductive hearing loss or Meniere’s disease, or diseases of the middle ear or psychogenic hearing loss were excluded from the study. Patients with tumors and cardiac diseases (insufficiency, ischemic cardiac disease, arrhythmias), and patients who were dialyzed, had alteration in coagulation, were allergy to heparin, h…	Single	Italy	NR	132	2	Non-Industry	NR	10 days after the treatment end	No	HELP apheresis + standard treatment (glycerol infusion + intramuscular dexamethasone) vs Standard treatment (glycerol infusion + intramuscular dexamethasone)	other therapies (please specify in the next column)	fibrinogen/LDL apheresis	HELPapheresis consisted of a single selective apheresis session	other therapies (please specify in the next column)	Glycerol	after single Help-apheresis session, infusion of 500 mL of glycerol, once a day for 10 days	systemic steroids	dexamethasone	after single Help-apheresis session intramuscular administration of dexamethasone, 8 mg once a day for 10 days.	NA	NA	NA	-								anti-inflammatory therapies	acyclovir
5	380	NA	Eftekharian (2015)	Main	NA	Sensorineural hearing loss of 30 dB or more covering at least three contiguous audiometric frequencies, which occur within three days or fewer, No identifiable cause despite adequate investigation, Normal or near normal hearing in the contralateral ear, Age between 18–60 years, No more than 10 days from the onset of disease, No history of previous treatment, No contraindication for proposed thera…	Any identified etiology during therapy, Previous disease or surgery in the affected ear, Pregnant or lactating women	Single	Iran	NR- trial duration: January 2009-October 2013	67	2	No funding	NR	3 months	No	Pulse therapy [IV steroid (methylprednisolone) + Oral steroid (prednisolone)] vs Oral steroid (prednisolone)	systemic steroids	methylprednisolone	500-mg daily intravenous methylprednisolone for 3 consecutive days	systemic steroids	prednisolone	1 mg/kg (maximum 60 mg) oral prednisolone for 11 days for Oral steroid group, and 1 mg/kg (maximum 60 mg) oral prednisolone for 14 days for Pulse therapy (IV steroid +oral steroid) group	NA	NA	NA	NA	NA	NA	-								anti-platelet vasodilatation	hydroxyethyl starch
6	258	NA	Yang (2010)	Main	NA	a hearing loss of 30 dB or more over at least three contiguous frequencies within 72 hours. The cause of SSNHL in these patients was unknown.	those whose hearing loss was caused by retro-cochlear lesions, bilateral sudden sensorineural hearing loss, and any patients with infectious or autoimmune diseases were excluded.	Single	Taiwan	NR	66	2	NR	NR	2 months	NR	Zinc +[ IV Steroid (Dexamethasone)+ Radiopaque contrast (diatrizoate sodium)+ Plasma expander ( Dextran 40)] vs + [ IV Steroid (Dexamethasone)+ Radiopaque contrast (diatrizoate sodium)+ Plasma expander ( Dextran 40)]	other therapies (please specify in the next column)	zinc	oral zinc gluconate (Zinga 78 mg, 10 mg elemental zinc; Panion & BF Biotech, Tapei, Taiwan) 2 tablets twice a day (1 hour before breakfast and 1 hour before lunch) was given for 2 months.	systemic steroids	dexamethasone	intravenous dexamethasone 5 mg/6 hours for 2 days, followed by 5 mg/8 hours for 2 days, and then 5 mg/12 hours for 1 day	anti-inflammatory therapies	Dextran 40	plasma expander (low molecular weight dextran, Dextran 40, 500 ml/day for 5 days).	NA	NA	NA	Note: and radiopaque contrast (diatrizoate sodium, Hypaque 76, 10 ml/day for 5 days)								No treatment	recombinant tissue
7	229	334, 32	Nosrati-Zarenoe (2012)	Main	NA	aged 18 to 80 years, referred by general practitioners or seeking care directly, presenting with sudden onset of hearing loss developing within 24 hours, and without any known cause (no earlier or present ear diseases). The average change in hearing threshold should be 30 dB or higher for the 3 most affected contiguous frequencies in the affected ear. Enrollment and treatment were to be started w…	common medical reasons for not using corticosteroids: pregnancy, diabetes, chronic infections, peptic ulcer, uncompensated heart disease, recent surgery, or psychiatric disease. The patients’ ordinary medication for concomitant disease was permitted except vascular, antiviral, or corticosteroid treatment.	Multicenter	Sweden	January 2006-September 2010	103	2	Non-Industry	EudraCT 2005-001487-32	3 months	No	Oral Prednisolone vs Placebo	systemic steroids	prednisolone	prednisolone as 10 mg capsules given as a single dose of 60 mg daily for 3 days, thereafter reduced by 10 mg per day, with a total treatment time of eight days. If recovery was complete treatment stopped; otherwise, medication was continued at 10 mg daily to a total of 30 days from beginning	NA	NA	NA	NA	NA	NA	NA	NA	NA	Note: Secondary Endpoint Measures were to evaluate prognostic variables efficacy									plasminogen activator
8	206	NA	Lim (2012)	Main	NA	The diagnostic criteria for ISSNHL consisted of acute onset of hearing loss greater than 30 dB in 3 consecutive frequencies occurring within 3 days.	patients who had a history of acoustic trauma, barotrauma, Me´nie`re’s disease, tumor, or other serious disease	Single	Korea	July 2008-November 2011	60	3	Non-Industry	NR	3 weeks	No	Oral prednisolone vs IT Dexamethasone vs (Oral prednisolone + IT Dexamethasone)	systemic steroids	prednisolone	prednisolone (Solondo; Yuhan, Seoul, Korea) for 10 days on a schedule consisting of 60 mg/d for 5 days, 40 mg/d for 2 days, 20 mg/d for 2 days, and 10 mg/d for 1 day	intratympanic steroid	dexamethasone	Dexamethasone (dexamethasone disodium phosphate, 5 mg/mL, 0.3-0.4 mL; Il Sung Pharm, Seoul,Korea) done twice weekly for 2 consecutive weeks.	Intratympanic steriod + oral steroid	Dexamethasone + prednisolone	patients received the ITDI procedure while simultaneously taking oral steroid for 2 weeks	NA	NA	NA										prostaglandin E 1
9	211	NA	Dispenza (2011)	Main	NA	SSHL of at least 30 dB across three contiguous frequencies over a period of 24 h.	previous episode of hearing loss, history of ear pathology, previous treatments administered elsewhere, and contraindication to systemic steroid administration. Patients lost during the follow-up and with evidence of retrocochlear disease at MRI (i.e., vestibular schwannoma) were excluded from the analysis	Single	Italy	January 2008 to December 2009	46	2	Unclear	NR	6 monts	No	IT steroid vs oral steroid	intratympanic steroid	dexamethasone	The transtympanic injection of Dexamethasone 4 mg/ml was repeated weekly for a total of four injections.	systemic steroids	Prednisolone	60 mg of oral Prednisone tapered over 14 days	NA	NA	NA	NA	NA	NA										naftidrofuryl
10	212	NA	Park (2011)	Main	NA	unilateral sensorineural hearing loss with an average hearing loss of 30 dB in 3 consecutive frequencies within 3 days.	younger than 18 years or older than 65 years, presented 7 days after onset, or had vertigo, diabetes, Me´nie`re disease, tumors, noiseinduced hearing loss, or any other identifiable etiology for sudden hearing loss.	Multicenter	Korea	NR	92	2	Non-Industry	NR	3 months	No	simultaneous IT-DEXA [Intratympanic dexamethason plus systemic steroid (IV dexamethasone followed by oral prednisolone)] vs. subsequent IT-DEXA [systemic steroid (IV dexa followed by oral prednisolone) followed by Intratympanic dexamethason]	intratympanic steroid	dexamethasone	0.3 to 0.4 ml of dexamethasone (5 mg/mL) was instilled intratympanically 7 days afrer bigining of systemic steroid OR simultaneous with systemic steroid therapy for a total of 6 injections over 2 weeks.	systemic steroids	dexamethasone	intravenous dexamethasone for 7 days (10 mg/d for 5 days and 7.5 mg/d for 2 days)	systemic steroids	prednisolone	after 7 days of IV dexa, prednisolone for 3 days in tapered doses after the patients were discharged from the hospital	NA	NA	NA										carbogen
11	223	NA	Filipo (2013)	Main	NA	diagnosed ISSNHL within 3 days from the onset, no previous therapy for ISSNHL, and age between 15 and 85 years.	hypertension and diabetes in a noncompensated status, history of ischemic disorders (stroke, heart attack), Meniere’s disease, retrocochlear diseases, autoimmune hearing loss (HL), trauma, fluctuating HL, radiation-induced HL, noise-induced HL, or any other identifiable etiology responsible or triggering sudden HL	Single	Italy	August 2011-March 2012	50	2	None	NR	37 days	No	IT Prednisolone +/- oral prednisolone (oral prednisolone given if not recovered after 7 days of treatment) vs. Placebo +/- oral prednisolone(oral prednisolone given if not recovered after 7 days of treatment)	intratympanic steroid	prednisolone	intratympanic administration of 0.3 ml of prednisolone (Deltacortene Sol; Bruno Farmaceutici, Rome, Italy) at a dose of 62.5 mg/mL once a day for 3 consecutive days.	systemic steroids	prednisolone	patients who did not show a complete recovery at T1 (7 days from the beginning of treatment) were treated with 8 days of oral prednisone at a tapering dose (62.5 mg per day for 4 days, followed by 37.5 mg for 2 days, and 25 mg for the last 2 days)	NA	NA	NA	NA	NA	NA										hyperbaric oxygen therapy
12	249	NA	Gordin (2002)	Main	NA	ISHL ( 30 dB hearing loss in three frequencies) that had developed within 2 weeks of referral, with no evidence of known cause. (Not stated under the inclusion criteria: The treatment was started only in patients with normal renal function, as measured by normal values of urea and creatinine).	specific diagnoses for HL (e.g.,Ménière’s disease, fluctuant hearing loss). Additionally, the followings were excluded (although not mentioned under the exclusion criteria): subjects suffered from side affect of intervention, or received medications other than what was intended in the protocol. Inadequate follow-up information, PTAs greater than 40 dB in the opposite ear.	Single	Israel	1992 - 1998	278	2	NR	NR	41 days	NR	carbogen inhalation vs carbogen inhalation + intravenous MgSO4.	other therapies (please specify in the next column)	MgSO4	intravenous therapy of 4 g of MgSO4 in 1000 ml of saline daily (14 drops/min)	increased tissue oxygenation therapies	carbogen	carbogen (95% O2, 5% CO2) inhalation (for a half-hour every 2 hours).	NA	NA	NA	NA	NA	NA										intratympanic methylprednisolone
13	202	663	WESTERLAKEN (2003)	Main	NA	I) sensorineural hearing loss of unknown cause; 2) hearing loss of at least 30 dB hearing level (HL) for 3 subsequent I-octave steps in frequency in the standard pure tone audiogram; 3) blank otologic history; and 4) hearing loss occurring within a period of 24 hours.	hearing loss occurred more than 14days before evaluation or if they had contraindications to the use of either prednisolone or acyclovir. Consulting specialists for ophthalmology and internal medicine were asked to exclude Cogan's syndrome. and systemic disease. After diagnostic samples were taken, a provisional diagnosis of ISSHL was made and treatment was initiated. In cases in which a cause of…	Multicenter	the Netherlands, Belgium	1994-1999	91	2	Non-Industry	NR	12 months after discharge	NR	IV acyclovir + IV steroid (prednisolone) vs IV steroid (prednisolone) + placebo	antivirals	acyclovir	acyclovir 10 mg/kg body weight intravenously 3 times daily for 7 days	systemic steroids	prednisolone	intravenous prednisolone in a dose of 1 mg/kg body weight on day 1, to be diminished in equal steps to 0 mg over the course of 7 days	Placebo	Placebo	NR- intravenously 3 times daily for 7 days	NA	NA	NA										fibrinogen/LDL apheresis
14	410	NA	Wang (2013)	Main	NA	Eligibility criteria included an age of at least 18 years and a unilateral sensorineural hearing loss that developed at least 30 dB in three contiguous frequencies within 72 h, and with duration of onset 3 months or more without receiving prior treatment. PTA, calculated as the arithmetic mean of the hearing thresholds at 500, 1,000, 2,000, and 4,000 Hz in the affected ear, in the affected ear mu…	Patients with ear disease that could be confused with idiopathic sudden hearing loss and patients with systemic disease who might be at increased risk of adverse effects from steroid treatment. Otologic exclusion criteria included a previous history of hearing loss in either ear, hearing asymmetry prior to onset, congenital hearing loss, fluctuating hearing or Meniere disease, history of genetic …	Unclear	China	August 2010-February 2012,	54	2	Non-Industry	NR	2 months	NR	Oral [Ginaton (extract of Ginkgo biloa leaves) + prednisone + mecobalamin] vs IV [Ginaton + IV Dexamethasone + IV mecobalamin]	other therapies (please specify in the next column)	Ginaton (extract of Ginkgo biloba leaves)	The oral group took oral medication with Ginaton (extract of Ginkgo biloba leaves) tablets 80 mg/time and 3 times per day for 14 days. In IV group; Ginaton injection with a dose of 105 mg every day by intravenous injection for 14 days.	systemic steroids	prednisone	prednisone 1 mg/kg (60 mg/day maximum) daily for 5 days followed by a 5-day taper (50, 40, 30, 20, and to 10 mg) for a total of 10 days.	systemic steroids	dexamethasone	dexamethasone 10 mg/day for 5 days followed by a dose of 5 mg/day for 5 day	other therapies (please specify in the next column)	mecobalamin	Oral mecobalamin tablets 500 lg/time and 3 times/day for 14 days; mecobalamin injection 500 lg/ day by intravenous injection for 14 days	NA									mannitol
15	224	NA	Hunchaisri (2015)	Main	NA	The patients enrolled in the study must have normal results of auditory brainstem response (ABR).The patients in the study group must accept oral zinc supplementation. Idiopathic sudden sensorineural hearing loss (ISSNHL) is defined as an abrupt onset of sensorineural hearing loss, within three days, and of at least 30 dB at three consecutive frequencies.	The patients with medical conditions that may cause ISSNHL were excluded, such as infections, trauma, diabetes, hyperlipidemia, and patients taking ototoxic drugs. Any patients whose ABR revealed retro-cochlear lesions were excluded. Nursing and pregnant women were also excluded, as well as those who were contraindicated for oral steroid and zinc supplementation	Unclear	Thailand	NR- study period: July 2012 and January 2014	30	2	NR	NR	one month after the start of treatment.	No	chelated zinc + standard treatment (oral prednisolone + betahistine+ vitamin B1-6-12) vs standard treatment(oral prednisolone + betahistine+ vitamin B1-6-12 )	other therapies (please specify in the next column)	chelated zinc	oral chelated zinc (75 mg, equivalent to 15 mg elemental zinc; Qualimed, Bangkok, Thailand) one tablet three times after meal	systemic steroids	prednisolone	oral prednisolone, 60 mg/day in adults and 1 mg/kg/day in children, for seven days	other therapies (please specify in the next column)	vitamin B1-6-12	vitamin B1-6-12 three times a day for one month.	other therapies (please specify in the next column)	betahistine	12 mg three times a day for one month	NA									nifedipine
16	413	NA	Kosyakov (2012)	Main	NA	patients with SSNHL with hearing loss in 3 contiguous frequencies of at least 30 dB, who had not previously been treated and were at least 18 years old.The time between the onset and the beginning of the therapy was less than 1 month.	Pts with somatic pathology (such as diabetes, hypertension, gastric ulcer, tuberculosis, glaucoma, and so on), for whom systemic steroids were contra-indicated;Oncology patients; autoimmune diseases or those who were constantly or periodically taking steroids;taking ototoxic agents;acoustic neurinoma;nursing women;middle ear diseases, abnormal type of tympanometric curves or barotrauma in their a…	Unclear	Russia	NR	75	3	NR		6 months after the beginning of the therapy	NR	IT steroid (Dexamethasone) vs. [IV steroid (dexamethasone)+IV (Pentoxifylline+Cocarboxylase+Potassium and magnesium asparate)+IM vitamin B-complex] vs. IV steroid (Dexamethasone)	intratympanic steroid	dexamethasone	Dex was injected through a tympanostomy tube fixed in the posteroinferior quadrant of the tympanic membrane (TM). Dex was given according to the following dosage regimen: 4 mg/cc every day during 10 days, 4 mg every other day over 20 days and then 4 mg 2 times a week over 5 months by injecting the drug in the tympanic cavity through the tympanostomy tube,	systemic steroids	dexamethasone	IV Dexamethasone (0.1 mg/kg) in 200 ml of isotonic solution intravenously intravenously daily over 10 days.	other therapies (please specify in the next column)	Pentoxifylline, Cocarboxylase, Potassium and magnesium aspartate intravenously and vitamin B-complexe intramuscularly	daily over 10 days	systemic steroids	dexamethasone	(0.1 mg/kg) daily over 10 days	Note: One of the groups with IV steroid, also received Pentoxifylline, Cocarboxylase, Potassium and magnesium aspartate intravenously and vitamin B-complexe intramuscularly									fludiazepam
17	256	NA	Swachia (2016)	Main	NA	Patients aged between 18 and 65 years reporting SSNHL who met NIDCD criteria were included.	Subjects who presented 14 days after onset of hearing loss, had a prior history of ear disease, history of noise-induced trauma, or congenital hearing loss were excluded. Pregnant women or patients in whom use of steroids was contraindicated, had history of head and neck cancer, or had undergone radiotherapy were also excluded from the study.	Single	India	NR	49	2	None		60 days from the day of start of treatment	No	Oral prednison vs intratympanic methylprednisolone	PO prednisolone	systemic steroids	Patients in group I were treated with oral prednisone. The dosage was 1 mg/kg body weight for the first 10 days. The drug was tapered to 0.5 mg/kg body weight for the next 2 days and then 0.25 mg/kg body weight for 2 days. The total duration of the drug therapy was 14 days	IT methylprednisolone	intratympanic steriod	patients received intratympanic methylprednisolone. One milliliter of the drug solution containing 40 mg of the drug (40 mg/mL) was injected into the middle ear cavity through transtympanic route. The drug was injected twice a week for 2 weeks in a row.																diazepam
18	960	NA	Tsounis (2017)	Main	NA	adults aged 18 years or older both male and female with minimum 30 dB HL hearing loss in three consecutive octaves that had occurred within a course of 3 days.	any recognized cause of SSHL such as Meniere’s disease, any previous treatment for the specific episode of ISSHL, interval of more than 14 days from the onset of the disease to initiation of the treatment and any contraindication to the use of systemic steroids, such as uncontrolled diabetes mellitus or hypertension.	Multicenter	Greece	NR- study period Sep 2013 and Sep 2016	102	3	NR		90 days after initiation of treatment	No	IV prednisolone +PO methylprednisolone vs. IT methylprednisolone vs. combination of IV+IT steroid (IV prednisolone, IT methylprednisolone)	IV prednisolone	prednisolone	1 mg/kg of body weight prednisolone per day for 7 days followed by 0.5 mg/kg of body weight prednisolone per day for another 3 days.	systemic steroids	methylprednisolone	oral methylprednisolone 32 mg/ day for 4 days followed by oral methylprednisolone 16 mg/ day for another 3 days.	IT methylprednisolone	methylprednisolone	While the patient lay in the supine position with the head tilted 45° to the healthy side a 25-gauge spinal needle was introduced into the posterior–inferior quadrant of the tympanic membrane, and 0.4–0.6 ml of 62.5 mg/ml methylprednisolone were slowly instilled intratympanically into the middle ear cleft. Patients were then instructed to avoid moving or swallowing for 20 min to create the opti- …				For the IT group, 1 h before each injection, every patient received orally 1 tablet that contained 500 mg paracetamol (Depon, Bristol-Myers Squibb, Athens, Greece) together with 1 tab- let that contained 400 mg paracetamol in combination with 10 mg codeine and 50 mg caffeine (Lonarid-N, Boehringer Ingelheim, Athens, Greece) for purposes of analgesia.									hyperbaric oxygen
19	954	NA	Ermutlu (2017)	Main	NA	All patients in the study population presented with unilateral SSHL of at least 30 dB including at least three frequencies and occurring within 72 h. Additional inclusion criteria were as follows: (1) age between 18 and 80 years, (2) time prior to treatment not exceeding 7 days, and (3) no history of previ- ous treatment.	atients with an identifiable cause, a history of previous otologic surgery on the affected ear, an acute or chronic otitis media of the affected ear were excluded.	Single	Turkey	NR- patients followed from June 2013 till January 2014	35	2	NR		3 months after initiation of treatment	No	Oral steroid vs IT	PO prednisolone	systemic steroids	Pred- nisolone was administered for the OS group starting with a daily divided dose of 1 mg/kg (maximum 80 mg) and tapering 10 mg every 3 days.	IT dexamethasone	dexamethasone	ITS administration was performed three times every other day using a surgical microscope. Patient was placed with the head tilted 45° to the opposite side. Local anesthesia was administered by applying a 10% lidocaine soaked cotton ball onto the tympanic membrane for approximately 10 min. Following the creation of an anterosuperior puncture with a 22-gauge needle for ventilation, a 27-gauge needl…							All patients received the standard treatment protocol of our institu- tion for SSHL; intravenous low molecular weight dextran (5 cc/kg) for 5–10 days, an oral diuretic agent (acetazola- mide) for a month, an oral antiviral agent (acyclovir) for 5 days, an oral vasodilator agent (betahistine), and an oral cytoprotective agent (trimetazidine) for 3 months.									vitamin A
20											1543																												vitamin E
21											1543-16=1527																												zinc
22																																							Chinese herbal medicine
23																																							Ginkgo biloba extract
32																																							AM-111 (a c-Jun N-terminal Kinase (JNK) ligand)
33																																							Ozone therapy (auto-haemotherapy)
34																																							Other (please specify)
35																																							Placebo
36																																							No Treatment
37																																							Methylprednisolone
38
39
40
41
42
43
44
45
46
47
48
49
50
51
52
53
54
55
56
57
58
59
60
61
62
63
64
65
66
67
68
69
70
71
72
73
74
75
76
77
78
79
80
81
82
83
84
85
86
87
88
89
90
91
92
93
94
95
96
97
98
99
100
101
102
103
104
105
106
107
108
109
110
111
112
113
114
115
116
117
118
119
120
121
122
123
124
125
126
127
128
129
130
131
132
133
134
135
136
137
138
139
140
141
142
143
144
145
146
147
148
149
150
151
152
153
154
155
156
157
158
159
160
161
162
163
164
165
166
167
168
169
170
171
172
173
174
175
176
177
178
179
180
181
182
183
184
185
186
187
188
189
190
191
192
193
194
195
196
197
198
199
200
201
202
203
204
205
206
207
208
209
210
211
212
213
214
215
216
217
218
219
220
221
222
223
224
225
226
227
228
229
230
231
232
233
234
235
236
237
238
239
240
241
242
243
244
245
246
247
248
249
250
251
252
253
254
255
256
257
258
259
260
261
262
263
264
265
266
267
268
269
270
271
272
273
274
275
276
277
278
279
280
281
282
283
284
285
286
287
288
289
290
291
292
293
294
295
296
297
298
299
300
301
302
303
304

## Sheet: demographics
S#
	STUDY CHARACTERISTICS							POPULATION BASELINE (1 row per intervention group in each study)
	RefID	Companion RefIDs/specific companion (if applicable)	First Author (publication year)	Analysis type	Specify the subgroup	Trt grp domain	Trt grp specific name	Sample size	Mean age	SD age	Median age	IQR age	Female N	Female %	Affected Right Ear	Affected Left Ear	Bilateral N (%)	Time (Mean days) from SSNHL onset to study enrollment	Time (SD days) from SSNHL onset to study enrollment	Time (Median days) from SSNHL onset to study enrollment	Time (IQR days) from SSNHL onset to study enrollment	Time (Mean days) from SSNHL onset to study treatment (if different than enrollment)	Time (SD days) from SSNHL onset to study treatment (if different than enrollment)	Time (Median days) from SSNHL onset to study treatment (if different than enrollment)	Time (IQR days) from SSNHL onset to study treatment (if different than enrollment)	Mean PTA of affected ear (dB)	SD PTA of affected ear (dB)	Median PTA of affected ear (dB)	IQR PTA of affected ear (dB)	Mean Hearing loss (dB)	SD Hearing loss	Median Hearing loss (dB)	IQR Hearing loss (d	Mild (> 20 to 40 dB) Hearing loss degree (initial PTA)	Moderate (41-70 dB) Hearing loss degree (initial PTA)	Moderate to Severe Hearing loss degree (initial PTA)	Severe (71- 90 dB)Hearing loss degree (initial PTA)	Profound (> 90 dB)Hearing loss degree (initial PTA)	Mean Hearing level in 0.25 KHz	SD Hearing level in 0.25 KHz	Mean Hearing level in 0.5 KHz	SD Hearing level in 0.5 KHz	Mean Hearing level in 1 KHz	SD Hearing level in 1 KHz	Mean Hearing level in 2 KHz	SD Hearing level in 2 KHz	Mean Hearing level in 3 KHz	SD Hearing level in 3 KHz	Mean Hearing level in 4 KHz
1	195	NA	Koo(2015)	Main	NA	other therapies (please specify in the next column)	Ginkgo biloba extract	24	48.93	10.59	NR	NR	NR	NR	NR	NR	NR	NR	NR	NR	NR	3.52	1.96	NR	NR	ACT (dB) 61.34, BCT (dB) 55.42	ACT (dB) 21.53, BCT (dB) 16.09.	NR	NR	NR	NR	NR	NR	NR	NR		NR	NR	NR	NR	NR	NR	NR	NR	NR	NR	NR	NR	NR
2	195	NA	Koo(2015)	Main	NA	Placebo	Placebo	24	46.53	12.54	NR	NR	NR	NR	NR	NR	NR	NR	NR	NR	NR	3.6	1.73	NR	NR	ACT (dB) 63.12, BCT (dB) 54.59.	ACT (dB) 24.28, BCT (dB) 16.45	NR	NR	NR	NR	NR	NR	NR	NR		NR	NR	NR	NR	NR	NR	NR	NR	NR	NR	NR	NR	NR
3	276	NA	Min Hong (2009)	Main	NA	intratympanic steroid-combination therapies	dexamethasone	32	56.9	NR	NR	NR	NR	NR	14	18	0	NR	NR	NR	NR	3.4	NR	NR	NR	77.5	27.6	NR	NR	NR	NR	NR	NR	2	6	4	10	10	63.07	20	74.1	20	81.53	20.26	76.41	20	77.94	20.26	75.89
4	276	NA	Min Hong (2009)	Main	NA	systemic steroids	prednisolone	31	56.2	NR	NR	NR	NR	NR	13	18	0	NR	NR	NR	NR	3.9	NR	NR	NR	79.9	23.5	NR	NR	NR	NR	NR	NR	2	4	5	10	10	68.2	20	80	19.74	83.33	20	78.46	20	78.71	19.49	78.71
5	288	NA	Gundogan (2013)	Main	NA	intratympanic steroid-combination therapies	combination therapy; intratympanic methylprednisolone + oral methylprednisolone	37	52.32	12.94	NR	NR	NR	NR	NR	NR	NR	NR	NR	NR	NR	4.7	4	NR	NR	80.7	22.81	NR	NR	NR	NR	NR	NR	NR	NR		NR	NR	NR	NR	NR	NR	NR	NR	NR	NR	NR	NR	NR
6	288	NA	Gundogan (2013)	Main	NA	systemic steroids	methylprednisolone	36	51.6	16.77	NR	NR	NR	NR	NR	NR	NR	NR	NR	NR	NR	5.14	3.52	NR	NR	76.3	27.18	NR	NR	NR	NR	NR	NR	NR	NR		NR	NR	NR	NR	NR	NR	NR	NR	NR	NR	NR	NR	NR
7	297	NA	Bianchin (2010)	Main	NA	other therapies (please specify in the next column)	fibrinogen/LDL apheresis	72	52.8	NR	NR	NR	NR	NR	37	35	0	NR	NR	NR	NR	12	NR	NR	NR	NR	NR	NR	NR	NR	NR	NR	NR	NR	NR		NR	NR	34.5	NR	37.5	NR	40.1	NR	40.7	NR	NR	NR	49.8
8	297	NA	Bianchin (2010)	Subgroup	Serum Fibrinogen Concentration <320 mg/dL	other therapies (please specify in the next column)	fibrinogen/LDL apheresis	NR	NR	NR	NR	NR	NR	NR	NR	NR	NR	NR	NR	NR	NR	NR	NR	NR	NR	NR	NR	NR	NR	NR	NR	NR	NR	NR	NR		NR	NR	51.7.	NR	54.8	NR	52.9	NR	49.8	NR	NR	NR	55.5
9	297	NA	Bianchin (2010)	Main	NA	systemic steroids	dexamethasone	60	60.4	NR	NR	NR	NR	NR	30	30	0	NR	NR	NR	NR	13	NR	NR	NR	NR	NR	NR	NR	NR	NR	NR	NR	NR	NR		NR	NR	46.8	NR	46	NR	41.9	NR	38.4	NR	NR	NR	50.8
10	380	NA	Eftekharian (2015)	Main	NA	systemic steroids	methylprednisolone + prednisolone	29	42.2	12.6	NR	NR	NR	NR	NR	NR	NR	NR	NR	NR	NR	6.7	2.2	NR	NR	76.07	25.6	NR	NR	NR	NR	NR	NR	NR	NR		NR	NR	NR	NR	65.51	34.26	72.24	32.83	80.34	25.14	86.2	23.66	87.24
11	380	NA	Eftekharian (2015)	Main	NA	systemic steroids	prednisolone	31	40.1	11.9	NR	NR	NR	NR	NR	NR	NR	NR	NR	NR	NR	7.3	2.3	NR	NR	66.85	26.54	NR	NR	NR	NR	NR	NR	NR	NR		NR	NR	NR	NR	62.5	29.77	63.87	30.73	66.12	28.71	74.83	25.28	77.74
12	258	NA	Yang (2010)	Main	NA	other therapies (please specify in the next column)	zinc	33	48.8	15.5	NR	NR	18	0.55	NR	NR	NR	NR	NR	NR	NR	4.8	NR	NR	NR	78.98	22.93	NR	NR	NR	NR	NR	NR	0	10		12	11	NR	NR	NR	NR	NR	NR	NR	NR	NR	NR	NR
13	258	NA	Yang (2010)	Main	NA	systemic steroids	dexamethasone	33	54.4	14.6	NR	NR	19	0.58	NR	NR	NR	NR	NR	NR	NR	5.2	NR	NR	NR	76.06	25.96	NR	NR	NR	NR	NR	NR	6	7		8	12	NR	NR	NR	NR	NR	NR	NR	NR	NR	NR	NR
14	206	NA	Lim (2012)	Main	NA	systemic steroids	prednisolone	20	51.3	14.5	NR	NR	10	NR	8	12	0	NR	NR	NR	NR	5.4	3.1	NR	NR	57.8	28.5	NR	NR	NR	NR	NR	NR	NR	NR	NR	NR	NR	NR	NR	NR	NR	NR	NR	NR	NR	NR	NR	NR
15	206	NA	Lim (2012)	Main	NA	intratympanic steroid	intratympanic dexamethasone	20	53.3	15.3	NR	NR	9	NR	10	10	0	NR	NR	NR	NR	10.1	8.1	NR	NR	58.9	31.2	NR	NR	NR	NR	NR	NR	NR	NR	NR	NR	NR	NR	NR	NR	NR	NR	NR	NR	NR	NR	NR	NR
16	206	NA	Lim (2012)	Main	NA	combination therapy: intratympanic steroid + oral steroid	combination of oral prednisolone and IT dexa	20	47.8	14.2	NR	NR	10	NR	9	11	0	NR	NR	NR	NR	9.6	7.5	NR	NR	56.8	28.3	NR	NR	NR	NR	NR	NR	NR	NR	NR	NR	NR	NR	NR	NR	NR	NR	NR	NR	NR	NR	NR	NR
17	206	NA	Lim (2012)	Main	NA	All participants of this study	Oral prednisolone vs IT dexa vs cmbination of both	60	50.8	14.6	NR	NR	29	48.3	27	33	NR	NR	NR	NR	NR	NR	NR	NR	NR	57.8	28.81	NR	NR	NR	NR	NR	NR	NR	NR	NR	NR	NR	NR	NR	NR	NR	NR	NR	NR	NR	NR	NR	NR
18	211	NA	Dispenza (2011)	Main	NA	intratympanic steroid-combination therapies	dexamethasone	25	47	NR	NR	NR	NR	NR	NR	NR	NR	NR	NR	NR	NR	9.4	NR	NR	NR	65	NR	NR	NR	NR	NR	NR	NR	NR	NR	NR	NR	NR	NR	NR	NR	NR	NR	NR	NR	NR	NR	NR	NR
19	211	NA	Dispenza (2011)	Main	NA	systemic steroids	prednisolone	21	54	NR	NR	NR	NR	NR	NR	NR	NR	NR	NR	NR	NR	3.8	NR	NR	NR	51	NR	NR	NR	NR	NR	NR	NR	NR	NR	NR	NR	NR	NR	NR	NR	NR	NR	NR	NR	NR	NR	NR	NR
20	211	NA	Dispenza (2011)	Main	NA	All participants of this study	IT DEXA vs Oral prednisone	46	50	NR	NR	NR	18	39.1	20	26	0	NR	NR	NR	NR	6.8	NR	NR	NR	59	NR	NR	NR	NR	NR	NR	NR	NR	NR	NR	NR	NR	NR	NR	NR	NR	NR	NR	NR	NR	NR	NR	NR
21	212	NA	Park (2011)	Main	NA	simultanous IT-DEXA[intratympanic steroid plus systemic steroid (IV steroid followed by oral steroid)]	IT dexamethason + IV dexamethasone +oral prednisolone	44	45.36	12.36	NR	NR	25	NR	NR	NR	NR	NR	NR	NR	NR	3.52	3.07	NR	NR	73.12	17.01	NR	NR	NR	NR	NR	NR	NR	NR	NR	NR	NR	NR	NR	NR	NR	NR	NR	NR	NR	NR	NR	NR
22	212	NA	Park (2011)	Main	NA	subsequent IT-DEXA[intratympanic steroid following systemic steroid (IV steroid followed by oral steroid)]	IV dexamethasone +oral prednisolone+ IT dexamethason	44	48.05	10.83	NR	NR	21	NR	NR	NR	NR	NR	NR	NR	NR	3	2.53	NR	NR	72.27	20.91	NR	NR	NR	NR	NR	NR	NR	NR	NR	NR	NR	NR	NR	NR	NR	NR	NR	NR	NR	NR	NR	NR
23	223	NA	Filipo (2013)	Main	NA	IT Prednisolone +/- oral prednisolone	IT prednisolone +/- oral prednisolone	25	49.9	12.6	NR	NR	11	NR	NR	NR	NR	NR	NR	NR	NR	NR	NR	NR	NR	53.7	9.25	NR	NR	NR	NR	NR	NR	NR	NR	NR	NR	NR	54.9	13.6	55.94	9.06	55.21	11.32	51.12	11.01	NR	NR	53.64
24	223	NA	Filipo (2013)	Main	NA	Placebo +/- oral prednisolone	Placebo +/- oral prednisolone	25	50.8	14.7	NR	NR	9	NR	NR	NR	NR	NR	NR	NR	NR	NR	NR	NR	NR	52.3	10	NR	NR	NR	NR	NR	NR	NR	NR	NR	NR	NR	51.71	12.07	50.81	10.81	50.81	12.79	50.63	11.71	NR	NR	53.15
25	223	NA	Filipo (2013)	Main	NA	Both group	IT Prednisolone (+ oral prednisolone if not recovered after 7 days of treatment) vs. Placebo (+ oral prednisolone if not recovered after 7 days of treatment)	50	50.4	13.6		NR	16		NR	NR	NR	NR	NR	NR	NR	NR	NR	NR	NR	NR	NR	NR	NR	NR	NR	NR	NR	NR	NR	NR	NR	NR	NR	NR	NR	NR	NR	NR	NR	NR	NR	NR	NR
26	249	NA	Gordin (2002)	Main	NA	other therapies (please specify in the next column)	magnesium sulphate	73	46.2	NR	NR	NR	NR	NR	NR	NR	NR	NR	NR	NR	NR	4.4	NR	NR	NR	56.8	NR	NR	NR	NR	NR	NR	NR	NR	NR	NR	NR	NR	NR	NR	NR	NR	NR	NR	NR	NR	NR	NR	NR
27	249	NA	Gordin (2002)	Main	NA	increased tissue oxygenation therapies	carbogen	60	47.7	NR	NR	NR	NR	NR	NR	NR	NR	NR	NR	NR	NR	4.7	NR	NR	NR	54.2	NR	NR	NR	NR	NR	NR	NR	NR	NR	NR	NR	NR	NR	NR	NR	NR	NR	NR	NR	NR	NR	NR	NR
28	249	NA	Gordin (2002)	Main	NA	All participants of this study	Carbogen vs Carbogen + Mg	133	46.8	16.03	NR	NR	81	NR	NR	NR	NR	NR	NR	NR	NR	NR	NR	NR	NR	55.1	NR	NR	NR	NR	NR	NR	NR	NR	NR	NR	NR	NR	NR	NR	NR	NR	NR	NR	NR	NR	NR	NR	NR
29	224	NA	Hunchaisri (2015)	Main	NA	other therapies (please specify in the next column)	chelated zinc + standard treatment (oral prednisolone + betahistine+ vitamin B1-6-12)	16	57.5	10.2	NR	NR	7	NR	9	7	0	NR	NR	NR	NR	26.6	37.8	NR	NR	68.1	25	NR	NR	NR	NR	NR	NR	NR	NR	NR	NR	NR	NR	NR	NR	NR	NR	NR	NR	NR	NR	NR	NR
30	224	NA	Hunchaisri (2015)	Main	NA	systemic steroids	standard treatment (oral prednisolone + betahistine+ vitamin B1-6-12)	14	64.6	11.3	NR	NR	10	NR	7	7	0	NR	NR	NR	NR	29.8	40.9	NR	NR	56.1	19.7	NR	NR	NR	NR	NR	NR	NR	NR	NR	NR	NR	NR	NR	NR	NR	NR	NR	NR	NR	NR	NR	NR
31	410	NA	Wang (2013)	Main	NA	other therapies (please specify in the next column)	Oral [Ginaton (extract of Ginkgo biloa leaves) + prednisone + mecobalamin]	26	59.5	NR	NR	NR	10	NR	16	10	0	8.2 YEARS	NR	NR	NR	NR	NR	NR	NR	72	NR	NR	NR	NR	NR	NR	NR	2	6	NR	12	6	NR	NR	NR	NR	NR	NR	NR	NR	NR	NR	NR
32	410	NA	Wang (2013)	Main	NA	other therapies (please specify in the next column)	IV [Ginaton (extract of Ginkgo biloa leaves) + prednisone + mecobalamin]	28	57	NR	NR	NR	12	NR	15	13	0	7.6 YEARS	NR	NR	NR	NR	NR	NR	NR	71.2	NR	NR	NR	NR	NR	NR	NR	2	10	NR	8	8	NR	NR	NR	NR	NR	NR	NR	NR	NR	NR	NR
33	410	NA	Wang (2013)	Main	NA	other therapies (please specify in the next column)	All participants;Oral Ginkgo biloba extract vs IV Oral Ginkgo biloba extract	54	57.5	NR	NR	NR	22	NR	31	23	0	7.8 YEARS	NR	NR	NR	NR	NR	NR	NR	71.6	NR	NR	NR	NR	NR	NR	NR	4	16	NR	20	14	NR	NR	NR	NR	NR	NR	NR	NR	NR	NR	NR
34	202	663	WESTERLAKEN (2003)	Main	NA	antivirals + steroid	IV acyclovir + IV prednisolone	37	45.9	15.9	NR	NR	14	NR	NR	NR	NR	4.4	3.9	NR	NR	NR	NR	NR	NR	62.9	21.6	NR	NR	NR	NR	NR	NR	NR	NR	NR	NR	NR	NR	NR	NR	NR	NR	NR	NR	NR	NR	NR	NR
35	202	663	WESTERLAKEN (2003)	Main	NA	placebo+ steroid	Placebo + IV Prednisolone	33	44.7	17.6	NR	NR	10	NR	NR	NR	NR	4.2	3.4	NR	NR	NR	NR	NR	NR	83.6	28	NR	NR	NR	NR	NR	NR	NR	NR	NR	NR	NR	NR	NR	NR	NR	NR	NR	NR	NR	NR	NR	NR
36	202	663	WESTERLAKEN (2003)	Main	NA	antivirals+steroid vs Placebo +steroid	All participants; Acyclovir vs Placebo	70	NR	NR	NR	NR	NR	NR	NR	NR	NR	NR	NR	NR	NR	NR	NR	NR	NR	72.7	NR	NR	NR	NR	NR	NR	NR	NR	NR	NR	NR	NR	NR	NR	NR	NR	NR	NR	NR	NR	NR	NR	NR
37	663 (This study is a companion for RefID 202)	202	STOKROOS (1998)	Main	NA	antivirals + steroid	IV acyclovir + IV prednisolone	22	42.9	NR	NR	NR	NR	NR	NR	NR	NR	NR	NR	NR	NR	NR	NR	NR	NR	67	NR	NR	NR	NR	NR	NR	NR	NR	NR	NR	NR	NR	NR	NR	NR	NR	NR	NR	NR	NR	NR	NR	NR
38	663 (This study is a companion for RefID 202)	202	STOKROOS (1998)	Main	NA	placebo+ steroid	Placebo + IV Prednisolone	21	45.7	NR	NR	NR	NR	NR	NR	NR	NR	NR	NR	NR	NR	NR	NR	NR	NR	91	NR	NR	NR	NR	NR	NR	NR	NR	NR	NR	NR	NR	NR	NR	NR	NR	NR	NR	NR	NR	NR	NR	NR
39	663 (This study is a companion for RefID 202)	202	STOKROOS (1998)	Main	NA	antivirals vs Placebo	All participants; Acyclovir vs Placebo	43	45.5	NR	NR	NR	NR	NR	NR	NR	NR	4	NR	NR	NR	NR	NR	NR	NR	79	NR	NR	NR	NR	NR	NR	NR	NR	NR	NR	NR	NR	NR	NR	NR	NR	NR	NR	NR	NR	NR	NR	NR
40	32	NA	Hultcrantz (2014)	Main	NA	systemic steroids	prednisolone	45	56.6	13	NR	NR	NR	NR	21	24	0	3	2	3	NR	NR	NR	NR	NR	67.4	20.9	NR	NR	NR	NR	NR	NR	NR	NR		NR	NR	NR	NR	NR	NR	NR	NR	NR	NR	NR	NR	NR
41	32	NA	Hultcrantz (2014)	Main	NA	Placebo	Placebo	42	55	13.5	NR	NR	NR	NR	22	20	0	3	2.1	2	NR	NR	NR	NR	NR	64	18.1	NR	NR	NR	NR	NR	NR	NR	NR		NR	NR	NR	NR	NR	NR	NR	NR	NR	NR	NR	NR	NR
42	229	334, 32	Nosrati-Zarenoe (2012)	Main	NA	systemic steroids	prednisolone	47	56.8	12.7	NR	NR	23	NR	22	25	0	NR	NR	NR	NR	3	1.9	3	NR	66.2	21.2	NR	NR	NR	NR	NR	NR	NR	NR	NR	NR	NR	NR	NR	NR	NR	NR	NR	NR	NR	NR	NR	NR
43	229	334, 32	Nosrati-Zarenoe (2012)	Main	NA	Placebo	Placebo	46	53.8	13.5	NR	NR	17	NR	24	22	0	NR	NR	NR	NR	3.2	2.3	2	NR	63.5	16.9	NR	NR	NR	NR	NR	NR	NR	NR	NR	NR	NR	NR	NR	NR	NR	NR	NR	NR	NR	NR	NR	NR
44	413		Kosyakov (2012)			systemic steroids + Pentoxifylline, Cocarboxylase, Potassium and magnesium aspartate and vitamin B-complexe	IV dexamethasone+ IV(Pentoxifylline, Cocarboxylase, Potassium and magnesium aspartate) and IM vitamin B-complexe	25	NR	NR	50	30-53	9	0.375	NR	NR	1 (4.2%)	NR	NR	NR	NR	< 1 month	NR	NR	NR	37.1	16.67	NR	NR	NR	NR	NR	NR	NR	NR	NR	NR	NR	NR	NR	NR	NR	NR	NR	NR	NR	NR	NR	NR
45	413		Kosyakov (2012)			systemic steroids	IV dexamethasone	25	NR	NR	40	32-53	12	0.48	NR	NR	0	NR	NR	NR	NR	< 1 month	NR	NR	NR	39.1	16.97	NR	NR	NR	NR	NR	NR	NR	NR	NR	NR	NR	NR	NR	NR	NR	NR	NR	NR	NR	NR	NR	NR
46	413		Kosyakov (2012)			intratympanic steroid	IT dexamethasone	25	NR	NR	49	35-52	10	0.416667	NR	NR	1 (4.2%)	NR	NR	NR	NR	< 1 month	NR	NR	NR	41	12.87	NR	NR	NR	NR	NR	NR	NR	NR	NR	NR	NR	NR	NR	NR	NR	NR	NR	NR	NR	NR	NR	NR
46	413		Kosyakov (2012)			All participants of this study	see above	75	43.4	11.9	46	33-52	31				2
47	256		Swachia (2016)			systemic steroids	PO prednisolone	26	NR	NR	NR	NR	NR	NR	NR	NR	4 (18.2%)	< 14 days	NR	NR	NR	NR	NR	NR	NR	60.95	21.98	NR	NR	NR	NR	NR	NR	NR	NR	NR	NR	NR	NR	NR	NR	NR	NR	NR	NR	NR	NR	NR	NR
48	256		Swachia (2016)			intratympanic steroid	IT methylprednisolone	23	NR	NR	NR	NR	NR	NR	NR	NR	3 (15.0%)	< 14 days	NR	NR	NR	NR	NR	NR	NR	66.12	24.16	NR	NR	NR	NR	NR	NR	NR	NR	NR	NR	NR	NR	NR	NR	NR	NR	NR	NR	NR	NR	NR	NR
49	960		Tsounis (2017)			systemic steroids	IV prednisolone + PO methylprednisolone	35	50.1	17.3	NR	NR	15	0.428571	18	17	0	NR	NR	NR	NR	3.1	3	NR	NR	NR	NR	NR	NR	81.1	28.8	NR	NR	NR	NR	NR	NR	NR	NR	NR	NR	NR	NR	NR	NR	NR	NR	NR	NR
50	960		Tsounis (2017)			intratympanic steroid	IT methylprednisolone	34	53.2	12	NR	NR	16	0.470588	20	14	0	NR	NR	NR	NR	4.6	3	NR	NR	NR	NR	NR	NR	81.4	23.3	NR	NR	NR	NR	NR	NR	NR	NR	NR	NR	NR	NR	NR	NR	NR	NR	NR	NR
51	960		Tsounis (2017)			combination therapy: intratympanic steroid + systemic steroids	IT methylprednisolone + IV prednisolone + PO methylprednisolone	33	51.7	15.8	NR	NR	15	0.454545	17	16	0	NR	NR	NR	NR	4	3.9	NR	NR	NR	NR	NR	NR	79.1	25.1	NR	NR	NR	NR	NR	NR	NR	NR	NR	NR	NR	NR	NR	NR	NR	NR	NR	NR
52	954		Ermutlu (2017)			systemic steroids	PO prednisolone	16	41.06	NR	NR	NR	7	0.4375	NR	NR	NR	NR	NR	NR	NR	2.69	NR	NR	NR	NR	NR	NR	NR	NR	NR	NR	NR	NR	NR	NR	NR	NR	NR	NR	NR	NR	NR	NR	NR	NR	NR	NR	NR
53	954		Ermutlu (2017)			intratympanic steroid	IT dexamethasone	19	49.68	NR	NR	NR	5	0.263158	NR	NR	NR	NR	NR	NR	NR	3.74	NR	NR	NR	NR	NR	NR	NR	NR	NR	NR	NR	NR	NR	NR	NR	NR	NR	NR	NR	NR	NR	NR	NR	NR	NR	NR	NR
54
55
56		cells that has some specific comments to be read before analyzing
57
58
59
60
61
62
63
64
65
66
67
68
69
70
71
72
73
74
75
76
77
78
79
80
81
82
83
84
85
86
87
88
89
90
91
92
93
94
95
96
97
98
99
100
101
102
103
104
105
106
107
108
109
110
111
112
113
114
115
116
117
118
119
120
121
122
123
124
125
126
127
128
129
130
131
132
133
134
135
136
137
138
139
140
141
142
143
144
145
146
147
148
149
150
151
152
153
154
155
156
157
158
159
160
161
162
163
164
165
166
167
168
169
170
171
172
173
174
175
176
177
178
179
180
181
182
183
184
185
186
187
188
189
190
191
192
193
194
195
196
197
198
199
200
201
202
203
204
205
206
207
208
209
210
211
212
213
214
215
216
217
218
219
220
221
222
223
224
225
226
227
228
229
230
231
232
233
234
235
236
237
238
239
240
241
242
243
244
245
246
247
248
249
250
251
252
253
254
255
256
257
258
259
260
261
262
263
264
265
266
267
268
269
270
271
272
273
274
275
276
277
278
279
280
281
282
283
284
285
286
287
288
289
290
291
292
293
294
295
296
297
298
299
300
301
302
303
304
[truncated: 61 more columns]

## Sheet: PTA improve, main
NMA data: PTA improvement, main analysis
y1	y2	y3	sd1	sd2	sd3	n1	n2	n3	t1	t2	t3	na	time	Study
25.72	44.05	NA	19.77	21.53	NA	36	37	NA	2	6	NA	2	28	Gundogan 2013
54.59	60	NA	31.8	37.84	NA	31	29	NA	2	4	NA	2	90	Eftekharian 2015
35.1	39	NA	38.3	20.1	NA	46	47	NA	1	2	NA	2	90	Nosrati-Zarenoe 2012
21	27.2	NA	6.6	8.4	NA	21	25	NA	2	5	NA	2	180	Dispenza 2011
18.24	14.68	NA	8.72	12.88	NA	22	20	NA	2	5	NA	2	60	Swachia 2016
18.7	12.1	21.9	19.1	14.6	26.2	20	20	20	2	5	6	3	21	Lim 2012
29	27	29.8	20.97	24.29	17.7	35	34	33	4	5	6	3	90	Tsounis 2017
y1b	sd1b	y1e	sd1e	y2b	sd2b	y2e	sd2e	y3b	sd3b	y3e	sd3e	N1	N2	N3	t1	t2	t3	na	time	Study
52.3	10.4	47.4	15.2	53.7	9.5	24.8	10.9	NA	NA	NA	NA	25	25	NA	1	5	NA	2	7	Filipo 2013
37.1	16.7	24.6	17	39.1	17	24.8	15.3	41	12.9	25.1	12.2	25	25	25	3	3	5	3	30	Kosyakov 2011
treatment	Txlabel
1	Placebo
2	PO steroid
3	IV steroid
4	IV + PO steroid
5	IT steroid
6	IT + systemic steroid
y1, y2, y3:		PTA improvement (baseline minus final) for studies which reported mean changes
sd1, sd2, sd3:		Standard deviation of PTA improvement (baseline minus final) for studies which reported mean changes
y1b-y3b, y1e-y3e:		PTA at baseline for studies which reported PTA at baseline and at final follow-up
sd1b-sd3b, sd1e-sd3e:		Standard deviation of PTA for studies which reported PTA at baseline and at final follow-up

## Sheet: Responders' recovery, main
NMA data: Responders' recovery, main analysis
r1	r2	r3	n1	n2	n3	t1	t2	t3	na	time	study	reference_category
22	33	NA	36	37	NA	2	6	NA	2	28	Gundogan 2013	<15 dB gain and final hearing poorer than 75 dB
17	17	NA	31	29	NA	2	4	NA	2	90	Eftekharian 2015	<10 dB gain
33	37	NA	42	43	NA	1	2	NA	2	90	Hultcrantz 2014	<10 dB gain
12	11	12	20	20	20	2	5	6	3	21	Lim 2012	<10 dB gain
5	24	NA	25	25	NA	1	5	NA	2	7	Filipo 2013	<10 dB gain
17	20	NA	21	25	NA	2	5	NA	2	180	Dispenza 2011	<10 dB gain
19	16	NA	22	20	NA	2	5	NA	2	60	Swachia 2016	<10 dB gain
12	15	17	25	25	25	3	3	5	3	30	Kosyakov 2011	<15 dB gain
27	24	26	35	34	33	4	5	6	3	90	Tsounis 2017	<15 dB gain and final hearing poorer than 75 dB
14	16	NA	16	19	NA	2	5	NA	2	90	Ermutlu 2017	<10 dB gain in PTA or <10% increase of WRS
treatment	Txlabel
1	Placebo
2	PO steroid
3	IV steroid
4	IV + PO steroid
5	IT steroid
6	IT + systemic steroid

## Sheet: Total recovery, main
NMA data: Total recovery, main analysis
r1	r2	r3	n1	n2	n3	t1	t2	t3	na	time	study	definition
10	14	NA	36	37	NA	2	6	NA	2	28	Gundogan 2013	final threshold <= 25 dB
6	7	NA	31	29	NA	2	4	NA	2	90	Eftekharian 2015	return to within 10 dB HL of normal audiogram (unaffected ear)
17	17	NA	42	43	NA	1	2	NA	2	90	Hultcrantz 2014	return to within 10 dB HL of normal audiogram (before HL)
6	3	8	20	20	20	2	5	6	3	21	Lim 2012	return to within 10 dB HL of normal audiogram (unaffected ear)
5	19	NA	25	25	NA	1	5	NA	2	7	Filipo 2013	final threshold <= 25 dB or identical to the unaffected ear
4	5	NA	22	20	NA	2	5	NA	2	60	Swachia 2016	final threshold <= 25 dB
5	5	6	25	25	25	3	3	5	3	30	Kosyakov 2011	return to within 15 dB HL of normal audiogram (before HL)
14	6	12	35	34	33	4	5	6	3	90	Tsounis 2017	final threshold <= 25 dB
12	12	NA	16	19	NA	2	5	NA	2	90	Ermutlu 2017	return to within 10 dB HL and within 5–10% WRS of unaffected ear
treatment	Txlabel
1	Placebo
2	PO steroid
3	IV steroid
4	IV + PO steroid
5	IT steroid
6	IT + systemic steroid

## Sheet: PTA improve, incl CAM
NMA data: PTA improvement, including CAM interventions
y1	y2	y3	sd1	sd2	sd3	n1	n2	n3	t1	t2	t3	na	time	Study
25.72	44.05	NA	19.77	21.53	NA	36	37	NA	2	8	NA	2	28	Gundogan 2013
54.59	60	NA	31.8	37.84	NA	31	29	NA	2	5	NA	2	90	Eftekharian 2015
14.28	25.38	NA	13.33	21.18	NA	33	33	NA	4	6	NA	2	60	Yang 2010
35.1	39	NA	38.3	20.1	NA	46	47	NA	1	2	NA	2	90	Nosrati-Zarenoe 2012
25.76	26.5	NA	18.04	17.91	NA	31	32	NA	3	7	NA	2	90	Hong 2009
21	27.2	NA	6.6	8.4	NA	21	25	NA	2	7	NA	2	180	Dispenza 2011
18.24	14.68	NA	8.72	12.88	NA	22	20	NA	2	7	NA	2	60	Swachia 2016
18.7	12.1	21.9	19.1	14.6	26.2	20	20	20	2	7	8	3	21	Lim 2012
29	27	29.8	20.97	24.29	17.7	35	34	33	5	7	8	3	90	Tsounis 2017
y1b	sd1b	y1e	sd1e	y2b	sd2b	y2e	sd2e	y3b	sd3b	y3e	sd3e	N1	N2	N3	t1	t2	t3	na	time	Study
52.3	10.4	47.4	15.2	53.7	9.5	24.8	10.9	NA	NA	NA	NA	25	25	NA	1	7	NA	2	7	Filipo 2013
37.1	16.7	24.6	17	39.1	17	24.8	15.3	41	12.9	25.1	12.2	25	25	25	4	4	7	3	30	Kosyakov 2011
treatment	Txlabel
1	Placebo
2	PO steroid
3	PO steroid + vasodil
4	IV steroid
5	IV + PO steroid
6	IV steroid + zinc
7	IT steroid
8	IT + systemic steroid
y1, y2, y3:		PTA improvement (baseline minus final) for studies which reported mean changes
sd1, sd2, sd3:		Standard deviation of PTA improvement (baseline minus final) for studies which reported mean changes
y1b-y3b, y1e-y3e:		PTA at baseline for studies which reported PTA at baseline and at final follow-up
sd1b-sd3b, sd1e-sd3e:		Standard deviation of PTA for studies which reported PTA at baseline and at final follow-up

## Sheet: Total recovery, incl CAM
NMA data: Total recovery, including CAM interventions
r1	r2	r3	n1	n2	n3	t1	t2	t3	na	time	study	definition
10	14	NA	36	37	NA	2	7	NA	2	28	Gundogan 2013	final threshold <= 25 dB
6	7	NA	31	29	NA	2	5	NA	2	90	Eftekharian 2015	return to within 10 dB HL of normal audiogram (unaffected ear)
17	17	NA	42	43	NA	1	2	NA	2	90	Hultcrantz 2014	return to within 10 dB HL of normal audiogram (before HL)
6	3	8	20	20	20	2	6	7	3	21	Lim 2012	return to within 10 dB HL of normal audiogram (unaffected ear)
5	19	NA	25	25	NA	1	6	NA	2	7	Filipo 2013	final threshold <= 25 dB or identical to the unaffected ear
9	10	NA	31	32	NA	3	6	NA	2	90	Hong 2009	final threshold <= 25 dB
4	5	NA	22	20	NA	2	6	NA	2	60	Swachia 2016	final threshold <= 25 dB
5	5	6	25	25	25	4	4	6	3	30	Kosyakov 2011	return to within 15 dB HL of normal audiogram (before HL)
14	6	12	35	34	33	5	6	7	3	90	Tsounis 2017	final threshold <= 25 dB
12	12	NA	16	19	NA	2	6	NA	2	90	Ermutlu 2017	return to within 10 dB HL and within 5–10% WRS of unaffected ear
treatment	Txlabel
1	Placebo
2	PO steroid
3	PO steroid + vasodil
4	IV steroid
5	IV + PO steroid
6	IT steroid
7	IT + systemic steroid

## Sheet: Responders' recovery, incl CAM
NMA data: Responders' recovery, including CAM interventions
r1	r2	r3	n1	n2	n3	t1	t2	t3	na	time	study	reference_category
22	33	NA	36	37	NA	2	7	NA	2	28	Gundogan 2013	<15 dB gain and final hearing poorer than 75 dB
17	17	NA	31	29	NA	2	5	NA	2	90	Eftekharian 2015	<10 dB gain
33	37	NA	42	43	NA	1	2	NA	2	90	Hultcrantz 2014	<10 dB gain
12	11	12	20	20	20	2	6	7	3	21	Lim 2012	<10 dB gain
5	24	NA	25	25	NA	1	6	NA	2	7	Filipo 2013	<10 dB gain
23	25	NA	31	32	NA	3	6	NA	2	90	Hong 2009	<15 dB gain and final hearing poorer than 75 dB
17	20	NA	21	25	NA	2	6	NA	2	180	Dispenza 2011	<10 dB gain
19	16	NA	22	20	NA	2	6	NA	2	60	Swachia 2016	<10 dB gain
12	15	17	25	25	25	4	4	6	3	30	Kosyakov 2011	<15 dB gain
27	24	26	35	34	33	5	6	7	3	90	Tsounis 2017	<15 dB gain and final hearing poorer than 75 dB
14	16	NA	16	19	NA	2	6	NA	2	90	Ermutlu 2017	<10 dB gain in PTA or <10% increase of WRS
treatment	Txlabel
1	Placebo
2	PO steroid
3	PO steroid + vasodil
4	IV steroid
5	IV + PO steroid
6	IT steroid
7	IT + systemic steroid

## Sheet: PTA improve, incl Park 2011
NMA data: PTA improvement, including IT steroid as (a salvage treatment) after systemic steroids
y1	y2	y3	sd1	sd2	sd3	n1	n2	n3	t1	t2	t3	na	time	Study
25.72	44.05	NA	19.77	21.53	NA	36	37	NA	2	6	NA	2	28	Gundogan 2013
54.59	60	NA	31.8	37.84	NA	31	29	NA	2	4	NA	2	90	Eftekharian 2015
35.1	39	NA	38.3	20.1	NA	46	47	NA	1	2	NA	2	90	Nosrati-Zarenoe 2012
21	27.2	NA	6.6	8.4	NA	21	25	NA	2	5	NA	2	180	Dispenza 2011
18.24	14.68	NA	8.72	12.88	NA	22	20	NA	2	5	NA	2	60	Swachia 2016
18.7	12.1	21.9	19.1	14.6	26.2	20	20	20	2	5	6	3	21	Lim 2012
29	27	29.8	20.97	24.29	17.7	35	34	33	4	5	6	3	90	Tsounis 2017
34.74	32.59	NA	25.65	25.54	NA	44	44	NA	6	7	NA	2	90	Park 2011
y1b	sd1b	y1e	sd1e	y2b	sd2b	y2e	sd2e	y3b	sd3b	y3e	sd3e	N1	N2	N3	t1	t2	t3	na	time	Study
52.3	10.4	47.4	15.2	53.7	9.5	24.8	10.9	NA	NA	NA	NA	25	25	NA	1	5	NA	2	7	Filipo 2013
37.1	16.7	24.6	17	39.1	17	24.8	15.3	41	12.9	25.1	12.2	25	25	25	3	3	5	3	30	Kosyakov 2011
treatment	Txlabel
1	Placebo
2	PO steroid
3	IV steroid
4	IV + PO steroid
5	IT steroid
6	IT + systemic steroid
7	IT steroid after systemic steroids
y1, y2, y3:		PTA improvement (baseline minus final) for studies which reported mean changes
sd1, sd2, sd3:		Standard deviation of PTA improvement (baseline minus final) for studies which reported mean changes
y1b-y3b, y1e-y3e:		PTA at baseline for studies which reported PTA at baseline and at final follow-up
sd1b-sd3b, sd1e-sd3e:		Standard deviation of PTA for studies which reported PTA at baseline and at final follow-up

## Sheet: Responders' recovery, incl Park
NMA data: Responders' recovery, including IT steroid as (a salvage treatment) after systemic steroids
r1	r2	r3	n1	n2	n3	t1	t2	t3	na	time	study	reference_category
22	33	NA	36	37	NA	2	6	NA	2	28	Gundogan 2013	<15 dB gain and final hearing poorer than 75 dB
17	17	NA	31	29	NA	2	4	NA	2	90	Eftekharian 2015	<10 dB gain
33	37	NA	42	43	NA	1	2	NA	2	90	Hultcrantz 2014	<10 dB gain
12	11	12	20	20	20	2	5	6	3	21	Lim 2012	<10 dB gain
5	24	NA	25	25	NA	1	5	NA	2	7	Filipo 2013	<10 dB gain
17	20	NA	21	25	NA	2	5	NA	2	180	Dispenza 2011	<10 dB gain
19	16	NA	22	20	NA	2	5	NA	2	60	Swachia 2016	<10 dB gain
12	15	17	25	25	25	3	3	5	3	30	Kosyakov 2011	<15 dB gain
27	24	26	35	34	33	4	5	6	3	90	Tsounis 2017	<15 dB gain and final hearing poorer than 75 dB
14	16	NA	16	19	NA	2	5	NA	2	90	Ermutlu 2017	<10 dB gain in PTA or <10% increase of WRS
37	34	NA	44	44	NA	6	7	NA	2	90	Park 2011	<15 dB gain and final hearing poorer than 75 dB
treatment	Txlabel
1	Placebo
2	PO steroid
3	IV steroid
4	IV + PO steroid
5	IT steroid
6	IT + systemic steroid
7	IT steroid after systemic steroids

[truncated: 1 more sheets: Total recovery, incl Park 2011]
